# Supplementary material for: Changes in Eating Habits and Physical Activity after COVID-19 Pandemic Lockdowns in Italy
Source: MDPI journal article supplement (doi:10.3390/nu13124522), 2021-12-17
Supplement: s1 [file s1]

**Table S1.** Different jobs of study subjects.

| <b>Type of Job</b>   | <b><i>n</i></b> |
|----------------------|-----------------|
| Architect            | 3               |
| Artist               | 1               |
| Bartender            | 1               |
| Biologist            | 3               |
| Cleaner              | 1               |
| Computer Technician  | 3               |
| Consultant           | 1               |
| Dressmaker           | 1               |
| Driver               | 1               |
| Engineer             | 1               |
| Farmer               | 1               |
| Gym Worker           | 1               |
| Homemaker            | 7               |
| Ice Cream Seller     | 1               |
| Fitness Instructor   | 1               |
| Lawyer               | 2               |
| Medical Doctor       | 1               |
| Office Worker        | 52              |
| Orthodontist         | 1               |
| Physiotherapist      | 2               |
| Policeman            | 1               |
| Professor/Teacher    | 5               |
| Psychotherapist      | 1               |
| Researcher           | 3               |
| Restorer             | 1               |
| Retired              | 8               |
| Sales Agent          | 1               |
| Soldier              | 1               |
| Student              | 7               |
| Theater Scenographer | 1               |
| Unemployed           | 4               |
